# 1 **Aminoglycoside antibiotics inhibit mycobacteriophage infection**

2 Zheng Jiang<sup>1#</sup>, Junwei Wei<sup>1#</sup>, Nan Peng<sup>1\*</sup> and Yingjun Li<sup>1\*</sup>

3 1 *State Key Laboratory of Agricultural Microbiology and College of Life Science and*  
4 *Technology, Huazhong Agricultural University, 430070 Wuhan, China*

5 #These authors contributed equally to this work.

6 \*Corresponding author:

7 Yingjun Li, Email: [yingjun@mail.hzau.edu.cn](mailto:yingjun@mail.hzau.edu.cn); Nan Peng, Email: [nanp@mail.hzau.edu.cn](mailto:nanp@mail.hzau.edu.cn)

8

## 9 **Abstract**

10 Antibiotic resistance is becoming the biggest current threat to global health. At the same time,  
11 phage therapy is witnessing a return of interest. The therapeutic use of bacteriophages, that infect  
12 and kill bacteria, is well suited to be a good strategy to combat antibiotic resistance. Furthermore,  
13 bacteriophages are increasingly used in combination with standard antibiotics against the  
14 drug-resistant pathogens. Interestingly, we found that the engineered mycobacteriophage  
15 phAE159 and natural phage D29 can not infect the *Mycobacterium tuberculosis* in the presence  
16 of kanamycin, hygromycin or streptomycin, but there is no effect on the phage infection in the  
17 presence of spectinomycin. Based on a series of studies and structural analysis of the above four  
18 aminoglycoside antibiotics, we can speculate as to the mechanism by which amino sugar group  
19 of aminoglycoside was able to selectively inhibit mycobacteriophage DNA replication. This is a  
20 rare discovery that broad-spectrum antibiotics inhibit phage infection. We envisioned that this  
21 study will provide guidance for people to combine phage and antibiotics to treat *M. tuberculosis*.

22

## 23 **Keywords**

24 antibiotic resistance, tuberculosis , phage therapy, aminoglycosides, mycobacteriophage

25

## 26 INTRODUCTION

27 Bacterial infection refers to the invasion of a host's tissue by pathogenic bacteria. Generally,  
28 antibiotics are the preferred antibacterial agents [1](#). However, bacteria can evolve resistance to  
29 antibiotics resulting from antibiotics abuse and natural evolution. Bacteriophage provides a  
30 alternative useful antibacterial approach, and has gradually been used in combination with  
31 standard antibiotics against the drug-resistance of pathogenic bacteria [2](#). An important question  
32 arises: Do antibiotics impact the pharmacodynamics of phage therapy?

33 In this study, we firstly found that the replication of mycobacteriophage was significantly  
34 inhibited by aminoglycoside antibiotics. We speculated as to the mechanism by which amino  
35 sugar group of aminoglycoside was able to selectively inhibit mycobacteriophage DNA  
36 replication. The discovery in this study may shake the previous understanding of the synergy of  
37 the phage and antibiotic therapies, providing guidance for people to combine phage and  
38 antibiotics to treat *M. tuberculosis*.

39

## 40 MATERIALS AND METHODS

### 41 Transduction of mycobacteriophage plasmid

42 *M. smegmatis* mc<sup>2</sup>155::pMV261 was grown in 7H9 to an OD<sub>600</sub> of 1.0 (~6×10<sup>8</sup> c.f.u. mL<sup>-1</sup>).  
43 Hundred milliliters of the culture was centrifuged and washed 3 times by 10% glycerol and  
44 resuspended in 5 ml 10 % glycerol. The phAE159 plasmid were electransformed into *M.*  
45 *smegmatis* mc<sup>2</sup>155. Cells were mixed with 3 mL of 7H9 top agar (containing 0.75% agar) and  
46 with/without 50 µg/mL kanamycin, then plated on 7H10 agar plates with/without 50 µg/mL  
47 kanamycin, and then incubated at 30°C for 3 days. The number of visible plaques was counted.  
48 Both 7H9 agar and 7H10 agar were added when the temperature of the medium was below 55 °C.

### 49 Phage propagation assay

50 The phage D29 and phAE159 was collected and serial dilutions by MP buffer, then they were  
51 spotted onto the lawns of *Mycobacterium*. Plates were incubated at 37 °C (30 °C for phAE159)  
52 overnight and phages were enumerated by counting plaques. These assays were repeated at least  
53 three times with similar results and a representative experiment is shown.

### 54 Construction of pSTR1

55 The *aadA* gene was amplified from pCDFDuet-1 plasmid using the primers STR-F and STR-R in

56 Table S3 and cloned into the pMV261 vector. The plasmid was transformed into *M. smegmatis*  
57 mc<sup>2</sup>155 by standard procedures [3](#). The recombinant strains were selected on 7H10 agar plates  
58 complemented with 50 µg/mL streptomycin and 50 µg/mL kanamycin. The positive clone was  
59 named mc<sup>2</sup>155::pSTR1. Then the mc<sup>2</sup>155::pSTR1 were incubated in 7H10 agar plates  
60 complemented with 50 µg/mL streptomycin or 100 µg/mL spectinomycin.

#### 61 **Growth curves analysis of *E. coli* being infected by phage T7**

62 *E. coli* strain DH5α was grown overnight with shaking in lysogeny broth (LB) medium at 37 °C.  
63 A 2% subculture was prepared in LB medium supplemented with kanamycin (50 µg/mL) and  
64 phage T7 was added at a multiplicity of infection of approximately 0.1. Subsequently, the  
65 number of DH5α present in cultures was determined by optical density at 600 nm every 2 h for  
66 an additional 15 h. Three biological replicates were tested for each group of kanamycin as well  
67 as the control, which contained no kanamycin or phage T7.

#### 68 **Pre-incubation of phage phAE159 with kanamycin**

69 Aliquots of phage phAE159 were incubated at 37 °C for 2 h with or without 50 µg/mL  
70 kanamycin. The phages were diluted with MP buffer and added into *M. smegmatis*  
71 mc<sup>2</sup>155::pMV261 cells, then the mixture was suspended in molten 3 mL of 7H9 top agar  
72 (with/without 50 µg/mL kanamycin) and overlaid onto 7H10 plates pre-added with kanamycin or  
73 not. After incubating the plates at 30 °C for 2 days, observe the growth of *M. smegmatis* mc<sup>2</sup>155.

#### 74 **Transmission electron micrograph analysis**

75 *M. smegmatis* mc<sup>2</sup>155 was grown in 7H9 medium at 37 °C with shaking, and the cells were  
76 harvested until the OD<sub>600</sub> (optical density at 600 nM) = 0.8. High titer phage D29 were then  
77 added into *M. smegmatis* mc<sup>2</sup>155 at a multiplicity of infection (MOI) of 100. The culture was  
78 incubated for 15 minutes with/without 50 µg/mL streptomycin before microscopic observation.  
79 Transmission electron microscopy (TEM) grids (Electron Microscopy Sciences CF400-CU) were  
80 prepared by drop-coating grids with each group, washing with water and staining with 2% uranyl  
81 acetate. Phages were imaged using the HITACHI H-7650 transmission electron microscope in  
82 the Microscopy Imaging Laboratory at the Huazhong Agricultural University.

#### 83 **Quantitative PCRs analysis**

84 *M. smegmatis* mc<sup>2</sup>155::pMV261 was grown in 7H9 with 10 folds phage D29 and 50 µg/mL  
85 streptomycin. Sampling culture fluid and centrifuged supernatant every 1 hour. Quantitative PCR

86 (qPCR) was performed as standard procedures to quantify D29-DNA [4](#). Each reaction mixture  
87 (20  $\mu\text{L}$ /well) contained 10  $\mu\text{L}$  of Hieff qPCR SYBR Green Master Mix No Rox, 1  $\mu\text{L}$  of 10  $\mu\text{M}$   
88 each of the gp69-qpcr-F and gp69-qpcr-R primer pair in Table S3, 7  $\mu\text{L}$  of DNase- and  
89 RNase-free sterile water, and 1  $\mu\text{L}$  of the sample or template DNA. Quantitative PCR and  
90 monitoring were performed in an ABI Quant Studio 5 System. PCR amplification was performed  
91 with an initial pre-incubation at 95°C for 5 min, followed by 40 cycles of amplification at 95 °C  
92 for 10 s, 60 °C for 20 s and 72 °C for 20 s. A 810 bp PCR product was generated using the  
93 standard PCR primers gp69-F/R in Table S3 and D29 DNA to construct the standard curve. After  
94 purification and determination of the DNA concentration, the linear double-stranded DNA  
95 standard was 10-fold serially diluted to obtain a standard series from  $1 \times 10^7$  to  $1 \times 10^1$  copies/ $\mu\text{L}$ .  
96 The copy numbers of the samples were determined by reading off the standard series with the Ct  
97 values of the samples.

98

## 99 **RESULTS AND DISCUSSION**

100 Our primary goal was to eliminate *Mycobacterium tuberculosis* by an engineered  
101 mycobacteriophage (unpublished data). In order to avoid the contamination of microbes in  
102 infection test, we used a *Mycobacterium tuberculosis* strain that carrying a plasmid with  
103 kanamycin-resistance gene and added kanamycin in the culture. Interestingly, we found that the  
104 engineered mycobacteriophage can not infect the host strain. Then, we examined the ability of  
105 kanamycin to inhibit the infection of the TM4-derived phasmid phAE159 [5](#) and D29. In the  
106 absence of kanamycin, the two phages were able to form plaques on lawns of *M. smegmatis*  
107 mc<sup>2</sup>155. In the presence of the above antibiotics, the replication of the two mycobacteriophages  
108 was inhibited 10<sup>3</sup>-fold or more (Fig. 1a). We determined an inhibitory concentration of 50  $\mu\text{g}/\text{mL}$   
109 for kanamycin inhibiting phage D29, which does not affect the growth of *M. smegmatis* mc<sup>2</sup>155  
110 (Fig. S1). Furthermore, we verified this effect in the infection test of *M. tuberculosis* H37Ra and  
111 *M. bovis* BCG by phage D29 (Fig. S2). This demonstrates that kanamycin can suppress the  
112 replication of the mycobacteriophages phAE159 and D29.

113 To determine whether other bacteriophages also can be suppressed by kanamycin, we examined  
114 the ability of kanamycin to protect *Escherichia coli* from lysis by the well-characterized dsDNA  
115 phages T7 and  $\lambda$ . In the plaque and growth curve assays, we found that the presence of

116 kanamycin did not affect the infection of *E. coli* phages (Fig. 1b). It suggested that this inhibitory  
117 effect might be specific to mycobacteriophages. In addition, we examined this effect for another  
118 commonly used antibiotic in *Mycobacterium*, hygromycin, which is also an aminoglycoside  
119 antibiotic. It was observed that the hygromycin was able to inhibit mycobacteriophages  
120 phAE159 and D29 effectively (Fig. 1c). Following, we examined the ability of kanamycin to  
121 suppress the lysis of *M. smegmatis* by the electroporation of the mycobacteriophage vector  
122 phAE159. The plaques were observed in the absence but not in the presence of kanamycin (Fig.  
123 1d).

124 In order to study whether the antibiotic directly acts on the phages, e.g., destroys the phages. *M.*  
125 *smegmatis* mc<sup>2</sup>155 were incubated with mycobacteriophages phAE159 and with/out kanamycin,  
126 then plated on 7H10 with/out kanamycin. The lawn of each treatment that are present after 2  
127 days growth of *M. smegmatis* showed that regardless of whether kanamycin was added during  
128 pre-incubation, as long as the kanamycin is in the solid medium in plates, the bacteria will not be  
129 lysed by the phage and grow well (Fig. 1e).

130 The two antibiotics we used earlier are aminoglycosides. Therefore, we considered whether this  
131 inhibitory effect is applicable to other aminoglycoside antibiotics. First, we constructed a  
132 plasmid pSTR1 carrying *aadA* (encoding aminoglycoside adenylyltransferase) gene, which  
133 confers resistance to streptomycin and spectinomycin. The antibiotic sensitivity testing  
134 experiments showed that *M. smegmatis* mc<sup>2</sup>155 harboring the recombinant plasmid tolerated  
135 streptomycin and spectinomycin well, while the WT could not grow in the presence of either of  
136 these two antibiotics (Fig. 1f). Next, we used propagation assays to explore the effect of these  
137 two antibiotics on the infection of mycobacteriophages. We found that the propagation of phage  
138 on the plate was significantly inhibited in the presence of streptomycin but had no effect in the  
139 presence of spectinomycin (Fig. 1g).

140 To explore the mechanism more intuitively, transmission electron microscope (TEM) analysis  
141 was performed to determine whether the adsorption capacity of mycobacteriophage is normal in  
142 the presence of antibiotics. Before microscopic observation, we mixed phage D29 and *M.*  
143 *smegmatis* mc<sup>2</sup>155 for 15 mins. We can see that the addition of streptomycin has no effect on the  
144 phage morphology, indicating that streptomycin cannot directly act on the phage. And phages  
145 can also attach to the surface of the bacteria normally, there is no difference compared with the

146 control group (Fig. 1h). This indicates that streptomycin does not inhibit the adsorption of  
147 mycobacteriophage to the cell surface of *Mycobacterium*. After the bacteriophage attached to the  
148 surface of the bacteria, the injection and cyclization of its genome DNA is a very rapid process.  
149 Therefore, we speculate that the inhibitory effect of antibiotics on phage infection may act after  
150 viral genome injection. We next used absolute quantification PCR to detect the content of phage  
151 DNA during the infection process. Bacteria were cultured in the presence of streptomycin,  
152 mycobacteriophages were then added at a high multiplicity of infection and detect the content of  
153 phage DNA in culture and supernatant every hour. In the absence of streptomycin, phage DNA  
154 increased exponentially after 1 hour of co-culture, While the phage DNA did not grow in the  
155 presence of streptomycin. This phenomenon was also observed for phage DNA in the host cells,  
156 indicating that streptomycin inhibits mycobacteriophage infecting host by block phage DNA  
157 replication (Fig. 1i).

158 The life cycle of a phage starts with the adsorption and injection of the genome into the host cell.  
159 After DNA injection, the phage genome circularizes, then the DNA replicates and assembles,  
160 finally the host cell is lysed, and the progeny phages are released. In briefly summary, in this  
161 study, visually observation of the morphology by TEM indicated that the aminoglycoside  
162 antibiotics does not prevent the phage adsorbing the host cell. The electroporation and  
163 pre-incubation of mycobacteriophage phAE159 and *M. smegmatis* mc<sup>2</sup>155 with/out kanamycin  
164 showed that the inhibition of kanamycin on phage occurs after the phage injects DNA into the  
165 host cell. Moreover, we observed that the mycobacteriophage DNA could not proliferate in host  
166 cells in the presence of streptomycin. Taken together, we determined that aminoglycosides were  
167 able to block phage DNA replication and allow the bacteria to survive (Fig. 1j).

168 Although the antibiotics we used here are all classified as aminoglycosides because they all  
169 contain aminocyclic alcohols, spectinomycin differs from the other three antibiotics in that it does  
170 not have an amino sugar group (Fig. S3). Based on the above observations and results, at this  
171 time, we can only speculate as to the mechanism by which amino sugar group in aminoglycoside  
172 was able to selectively inhibit mycobacteriophage DNA replication. Therefore, further  
173 investigations to explore their mechanisms of action will expand our knowledge of bacterial  
174 anti-phage defense systems [6](#) and the arms race between bacteria and phage foes [7](#). In addition, it  
175 is particularly noteworthy that streptomycin is a first-line drug for tuberculosis, thus the

176 discovery in this study may shake the previous understanding of the synergy of the two therapies,  
177 phages and antibiotics [8](#). We envisioned that this study will provide guidance for people to  
178 combine phage and antibiotics to treat *M. tuberculosis*.

179

## 180 **ACKNOWLEDGMENTS**

181 We are grateful to Prof Chen Tan, Prof Jinsong Li, Prof Hui Jin and Yibao Chen for providing  
182 phAE159, D29,  $\lambda$  and T7 phages, respectively. We also thank Dr Min Yang and Dr Hua Zhang  
183 for providing *Mycobacterium* strains and the shuttle vector pMV261. This work was supported  
184 by the National Natural Science foundation of China (31801035), National Postdoctoral Program  
185 for Innovative Talents (BX201800113), Natural Science Foundation of Hubei Province  
186 (2018CFB223), China Postdoctoral Science Foundation (2018M640708).

187

## 188 **Author contributions**

189 ZJ, JW, NP and YL designed experiments. ZJ, JW and YL performed the experiments. ZJ, JW,  
190 NP and YL analyzed the data presented in the manuscript. All authors discussed and approved  
191 the manuscript.

192

## 193 **Conflicts of interest**

194 No potential conflicts of interest were disclosed.

195

## 196 **References**

- 197 1 Kohanski, M. A., Dwyer, D. J., Hayete, B., Lawrence, C. A. & Collins, J. J. A common mechanism of  
198 cellular death induced by bactericidal antibiotics. *Cell* **130**, 797-810, doi:10.1016/j.cell.2007.06.049 (2007).
- 199 2 Comeau, A. M., Tetart, F., Trojet, S. N., Prere, M. F. & Krisch, H. M. Phage-Antibiotic Synergy (PAS):  
200 beta-lactam and quinolone antibiotics stimulate virulent phage growth. *PLoS One* **2**, e799,  
201 doi:10.1371/journal.pone.0000799 (2007).
- 202 3 Li, J. M. *et al.* Isocitrate lyase from *Mycobacterium tuberculosis* promotes survival of *Mycobacterium*  
203 *smegmatis* within macrophage by suppressing cell apoptosis. *Chin Med J (Engl)* **121**, 1114-1119 (2008).
- 204 4 Miyajima, Y. *et al.* Rapid real-time diagnostic PCR for *Trichophyton rubrum* and *Trichophyton*  
205 *mentagrophytes* in patients with tinea unguium and tinea pedis using specific fluorescent probes. *J*  
206 *Dermatol Sci* **69**, 229-235, doi:10.1016/j.jdermsci.2012.11.589 (2013).
- 207 5 Bardarov, S. *et al.* Specialized transduction: an efficient method for generating marked and unmarked  
208 targeted gene disruptions in *Mycobacterium tuberculosis*, *M. bovis* BCG and *M. smegmatis*. *Microbiology*  
209 **148**, 3007-3017, doi:10.1099/00221287-148-10-3007 (2002).
- 210 6 Kronheim, S. *et al.* A chemical defence against phage infection. *Nature* **564**, 283-286,

211 doi:10.1038/s41586-018-0767-x (2018).

212 7 Hampton, H. G., Watson, B. N. J. & Fineran, P. C. The arms race between bacteria and their phage foes.  
213 *Nature* **577**, 327-336, doi:10.1038/s41586-019-1894-8 (2020).

214 8 Abedon, S. T. Phage-Antibiotic Combination Treatments: Antagonistic Impacts of Antibiotics on the  
215 Pharmacodynamics of Phage Therapy? *Antibiotics (Basel)* **8**, doi:10.3390/antibiotics8040182 (2019).

216

217



218 **Fig. 1. Aminoglycoside antibiotics inhibit the DNA replication of mycobacteriophages.**

219 **a.** The replication of the two mycobacteriophages phAE159 and D29 were inhibited by  
220 kanamycin on the lawns of *M. smegmatis* mc<sup>2</sup>155. **b.** Kanamycin could not affect the infection of  
221 *Escherichia coli* phages T7 and  $\lambda$ . **c.** Hygromycin was able to inhibit the infection of  
222 mycobacteriophages phAE159 and D29. **d.** Kanamycin inhibits the formation of plaques by  
223 electrotransformation of phAE159 vector. **e.** Pre-incubation with kanamycin does not affect the  
224 infection of mycobacteriophage phAE159. **f.** *M. smegmatis* mc<sup>2</sup>155 harboring the recombinant  
225 plasmid tolerated streptomycin and spectinomycin well. **g.** The propagation of  
226 mycobacteriophage D29 was significantly inhibited in the presence of streptomycin but had no  
227 effect in the presence of spectinomycin. **h.** TEM analysis of the adsorption capacity of  
228 mycobacteriophage in the presence of streptomycin. **i.** Quantitative PCR analysis of phage DNA  
229 proliferation during the infection process. **j.** Aminoglycosides were speculated to be able to block  
230 the DNA replication during the life cycle of phage (adapted from Fig.3a in [6](#)).

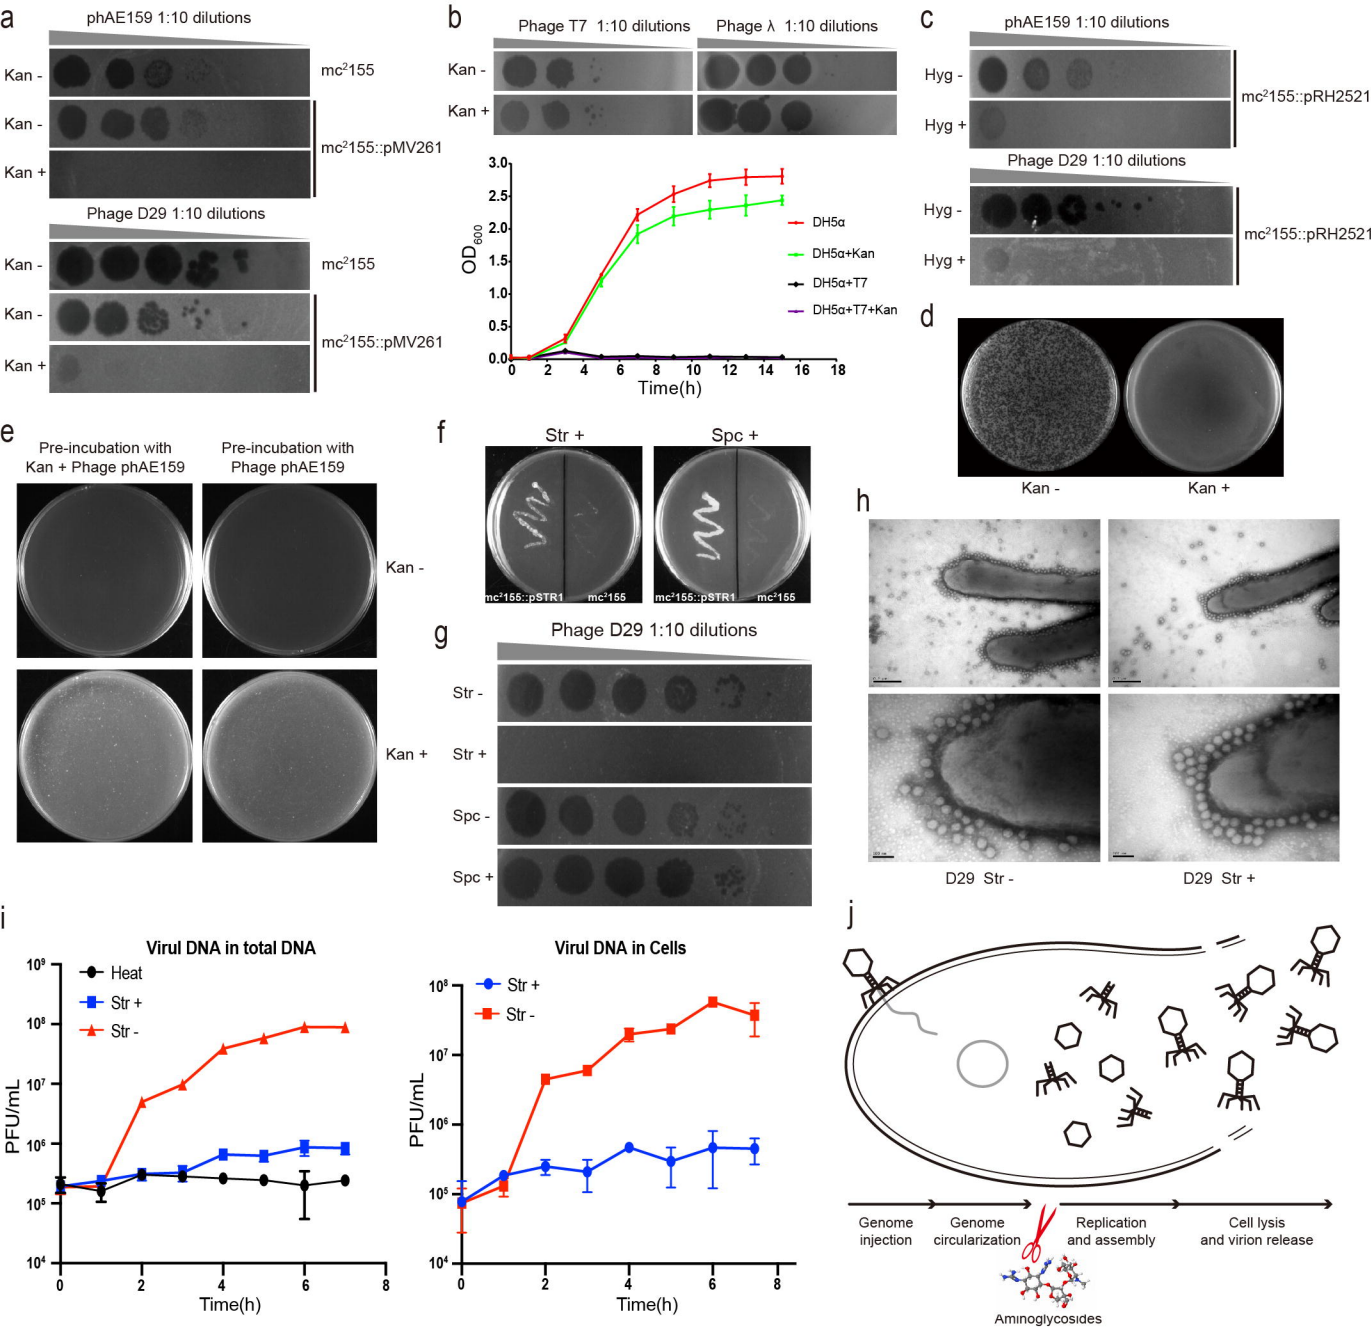

Source: http://biorxiv.org/content/10.1101/2020.07.03.185546v1.full.pdf
